# Supplementary material for: Interactions between earliest Linearbandkeramik farmers and central European hunter gatherers at the dawn of European Neolithization
Source: PubMed Central journal article supplement (PMC6925266; doi:10.1038/s41598-019-56029-2), 2019-12-20
Supplement: 41598_2019_56029_MOESM1_ESM.pdf [file 41598_2019_56029_MOESM1_ESM.pdf]

# Interactions between earliest *Linearbandkeramik* farmers and central European hunter gatherers at the dawn of European Neolithization

Alexey G. Nikitin, Peter Stadler, Nadezhda Kotova, Maria Teschler-Nicola, T. Douglas Price, Jessica Hoover, Douglas J. Kennett, Iosif Lazaridis, Nadin Rohland, Mark Lipson, and David Reich

## Supplementary Information

### **Supplementary Figure S1.**

A zoomed-in PCA plot from Figure 1, showing the position of Individuals 1 (I6912) and 3 (I6914) relative to Anatolian and European Neolithic farmers. .... 2

**Supplementary Table S1.** Library-level metrics for Brunn Wolfholz site 2 genetic data. .... 3

**Supplementary Figure S1.** A zoomed-in PCA plot from Figure 1, showing the position of Individuals 1 (I6912) and 3 (I6914) relative to Anatolian and European Neolithic farmers.

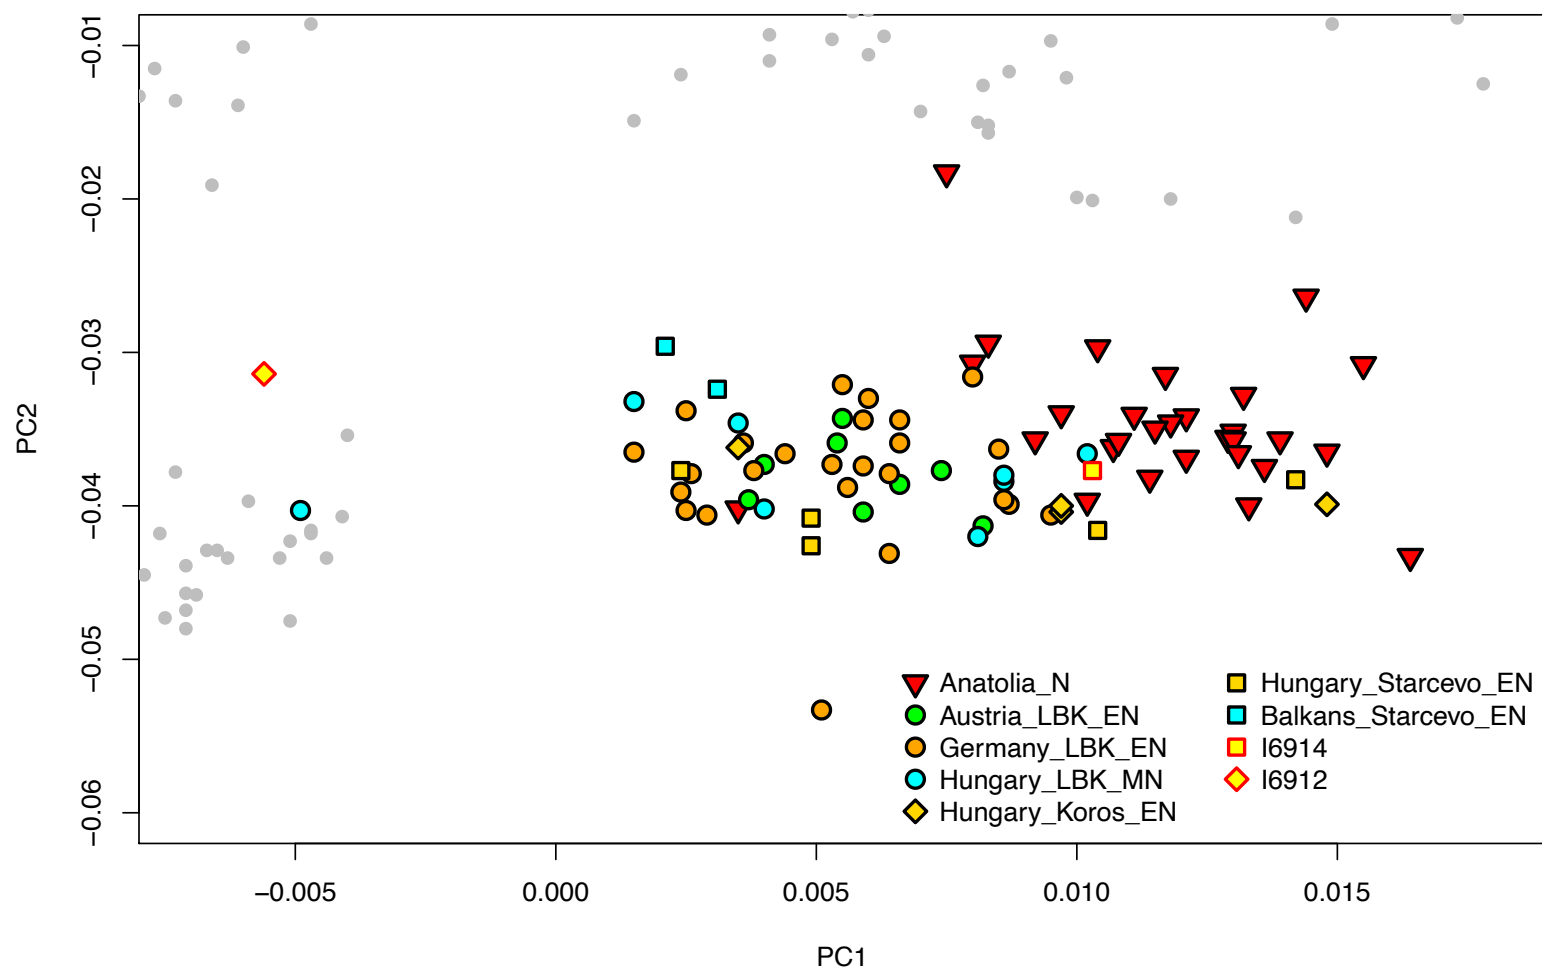

**Supplementary Table S1.** Library-level metrics for Brunn Wolfholz site 2 genetic data.

| Library ID                      | S6912.E1.L3                                                              | S6912.E1.L2     | S6912.E1.L3     | S6912.E1.L5     | S6912.E1.L6     | S6913.E1.L1                                                                         | S6914.E1.L1                                                           | S6915.E1.L1                                                          |
|---------------------------------|--------------------------------------------------------------------------|-----------------|-----------------|-----------------|-----------------|-------------------------------------------------------------------------------------|-----------------------------------------------------------------------|----------------------------------------------------------------------|
| Lab Ind. ID                     | I6912                                                                    | I6912           | I6912           | I6912           | I6912           | I6913                                                                               | I6914                                                                 | I6915                                                                |
| Skeletal Code/Element           | Ind. #1, left lower first or second molar (permanent tooth no. 36 or 37) |                 |                 |                 |                 | Ind. #2, left or right lower second molar (permanent mandibular molar no. 37 or 47) | Ind. #3, right lower second molar (permanent mandibular molar no. 47) | Ind. #4, left lower second molar (permanent mandibular molar no. 37) |
| Powder Extracted (mg)           | 69                                                                       | 69              | 69              | 69              | 69              | 73                                                                                  | 82                                                                    | 76                                                                   |
| Library protocol                | Double-stranded                                                          | Double-stranded | Single-stranded | Double-stranded | Single-stranded | Double-stranded                                                                     | Double-stranded                                                       | Double-stranded                                                      |
| UDG Treatment                   | partial                                                                  | minus           | minus           | partial         | partial         | partial                                                                             | partial                                                               | partial                                                              |
| uL Extract Used                 | 10                                                                       | 10              | 10              | 10              | 10              | 10                                                                                  | 10                                                                    | 10                                                                   |
| mg Equivalent Powder Used       | 7.7                                                                      | 7.7             | 7.7             | 7.7             | 7.7             | 8.1                                                                                 | 9.1                                                                   | 8.4                                                                  |
| mtDNA Raw Sequences             | 1540475                                                                  | 4895353         | 5569976         | 4363797         | 5222170         | 1763868                                                                             | 1574760                                                               | 1628891                                                              |
| mtDNA Sequences Passing Filters | 1328578                                                                  | 4280940         | 4539284         | 3394382         | 4031310         | 1557034                                                                             | 1443480                                                               | 1320302                                                              |

|                                              |               |               |               |               |               |               |               |               |
|----------------------------------------------|---------------|---------------|---------------|---------------|---------------|---------------|---------------|---------------|
| <b>mtDNA Sequences Aligning</b>              | 344350        | 33525         | 61320         | 28964         | 61225         | 393193        | 46072         | 2623          |
| <b>mtDNA Sequences Aligning PostDedup</b>    | 19275         | 17161         | 36981         | 13126         | 35607         | 58380         | 18405         | 346           |
| <b>mtDNA Coverage</b>                        | 54.4          | 55.5          | 127.3         | 39.7          | 111.8         | 187.0         | 48.7          | 0.9           |
| <b>mtDNA Median [Mean] Seq Length</b>        | 45            | [53.6]        | [57.1]        | [50.1]        | [52.0]        | 50            | 43            | 43            |
| <b>mtDNA Damage Last Base</b>                | 0.13          | 0.45          | 0.47          | 0.13          | 0.14          | 0.08          | 0.14          | 0.11          |
| <b>mtDNA Consensus Match</b>                 | 1.000         | 0.984         | 0.955         | 0.998         | 0.976         | 1.000         | 0.961         | 0.918         |
| <b>mtDNA Consensus Match 95CI</b>            | [0.997,1.000] | [0.963,0.994] | [0.932,0.973] | [0.990,1.000] | [0.962,0.986] | [0.998,1.000] | [0.951,0.968] | [0.838,0.967] |
| <b>mtDNA Haplogroup</b>                      | J1            | J1            | J1c8          | J1            | J1c           | U5a1          | K1b1a         | ..            |
| <b>Nuclear Raw Reads</b>                     | 4142974       | 4895353       | 5569976       | 4363797       | 5222170       | 4716548       | 11664837      | 5602849       |
| <b>Nuclear Sequences Merged with Barcode</b> | 3456700       | 4280940       | 4539284       | 3394382       | 4031310       | 4092020       | 10590010      | 4933624       |

|                                                      |       |        |        |        |        |       |         |       |
|------------------------------------------------------|-------|--------|--------|--------|--------|-------|---------|-------|
| <b>Nuclear Target Sequences Passing QC PreDedup</b>  | 76508 | 13533  | 26209  | 10776  | 32522  | 52727 | 2709080 | 10521 |
| <b>Nuclear Target Sequences Passing QC PostDedup</b> | 5222  | 4751   | 12941  | 3298   | 15246  | 7699  | 642592  | 1219  |
| <b>Nuclear Unique SNPS Hit</b>                       | 4830  | 3866   | 10888  | 3351   | 15488  | 7223  | 429000  | ..    |
| <b>Nuclear Coverage at Targeted Positions</b>        | 0.004 | 0.004  | 0.011  | 0.003  | 0.013  | 0.006 | 0.497   | ..    |
| <b>Nuclear Median [Mean] Seq Length</b>              | 43    | [58.8] | [64.7] | [55.9] | [62.4] | 39    | 44      | 37    |
| <b>Nuclear Damage Last Base</b>                      | 0.03  | 0.32   | 0.32   | 0.09   | 0.08   | 0.03  | 0.10    | 0.01  |
| <b>Nuclear X Hits</b>                                | 103   | 77     | 303    | 56     | 333    | 150   | 9551    | ..    |
| <b>Nuclear Y Hits</b>                                | 73    | 40     | 142    | 25     | 135    | 107   | 7109    | ..    |
| <b>Nuclear Sex</b>                                   | M     | M      | M      | M      | M      | M     | M       | ..    |
| <b>Nuclear ANGSD SNPs</b>                            | 1     | 0      | 0      | 1      | 4      | 0     | 345     | 0     |
| <b>Nuclear ANGSD X-contam Mean</b>                   |       |        |        |        |        |       | 0.0044  |       |

**Nuclear ANGSD  
X-contam Z-  
score**

0.8999
